# Supplementary material for: Short-range surface plasmonics: Localized electron emission dynamics from a 60-nm spot on an atomically flat single-crystalline gold surface
Source: PubMed Central journal article supplement — Sci Adv. 2017 Jul 12;3(7):e1700721. doi: 10.1126/sciadv.1700721 (PMC5507637; doi:10.1126/sciadv.1700721), 2017-07-12
Supplement: 1700721_SM.pdf [file 1700721_SM.pdf]

## Supplementary Materials for

### **Short-range surface plasmonics: Localized electron emission dynamics from a 60-nm spot on an atomically flat single-crystalline gold surface**

Bettina Frank, Philip Kahl, Daniel Podbiel, Grisha Spektor, Meir Orenstein, Liwei Fu, Thomas Weiss, Michael Horn-von Hoegen, Timothy J. Davis, Frank-J. Meyer zu Heringdorf, Harald Giessen

Published 12 July 2017, *Sci. Adv.* **3**, e1700721 (2017)  
DOI: 10.1126/sciadv.1700721

#### **The PDF file includes:**

- fig. S1. Determination of phase and group velocity of SR-SPPs.
- Legends for movies S1 and S2

**Other Supplementary Material for this manuscript includes the following:**  
(available at [advances.sciencemag.org/cgi/content/full/3/7/e1700721/DC1](http://advances.sciencemag.org/cgi/content/full/3/7/e1700721/DC1))

- movie S1 (.avi format). Nanofocusing movie experiment.
- movie S2 (.mp4 format). Nanofocusing movie theory.

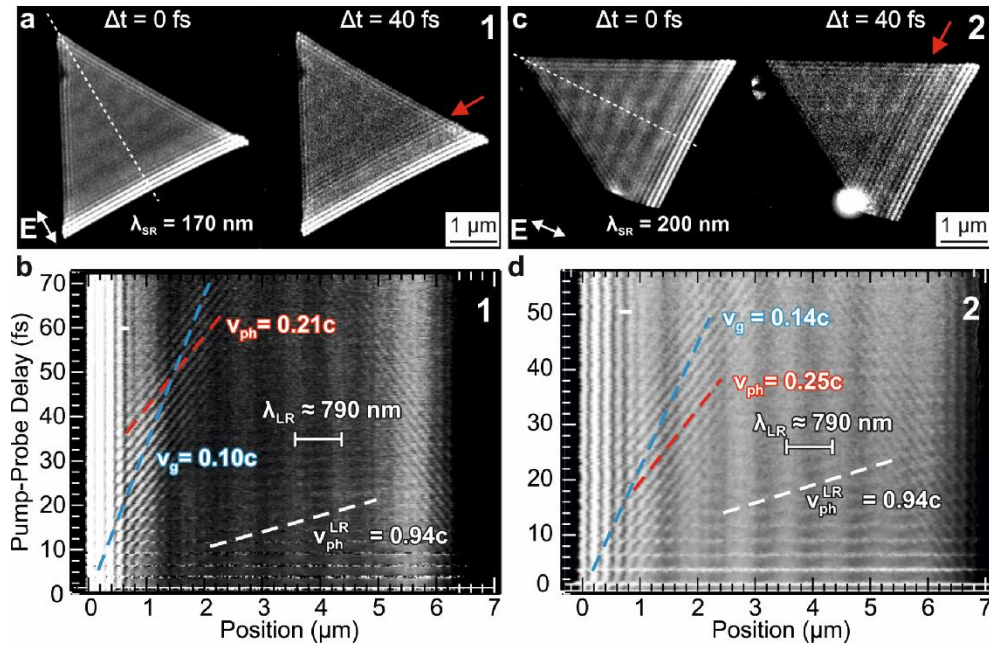

**fig. S1. Determination of phase and group velocity of SR-SPPs.** (a) PEEM images of a ~20 nm thick platelet (“1”) with propagating short-range surface plasmon polaritons at 0 and 40 fs time difference between the two laser pulses. (b) Plot of the normalized PEEM intensity along the dashed line of figure (a) as a function of position (x-axis) and time delay (y-axis). The slopes of the blue and red dashed lines indicate the short-range plasmon group and phase velocities, respectively. The slope of the white dashed line indicates the long-range plasmon phase velocity. (c) PEEM images of a ~40 nm thick platelet (“2”) with propagating short-range surface plasmon polaritons at 0 and 40 fs time difference between the two laser pulses. (d) Plot of the PEEM intensity along the dashed line of figure (c) as a function of position along the dashed line (x-axis) and time delay (y-axis). The slopes of the dashed blue and red lines indicate the short-range plasmon group and phase velocities, respectively. The slope of the white dashed line indicates the long-range plasmon phase velocity. The red arrows in (a) and (c) indicate the position of the short-range surface plasmon polaritons at 40 fs delay time.

**movie S1. Nanofocusing movie experiment.**

**Time-resolved PEEM movies of short-range plasmonic nanofocus formation.** This movie contains snapshots of the short range SPP experimental movie.

**movie S2. Nanofocusing movie theory.**

**Time-resolved PEEM movies of short-range plasmonic nanofocus formation.** This movie contains snapshots of the short range SPP theoretical movie.
